# Supplementary material for: HPV16 E7 Nucleotide Variants Found in Cancer-Free Subjects Affect E7 Protein Expression and Transformation
Source: MDPI journal article supplement (doi:10.3390/cancers14194895), 2022-10-06
Supplement: s1 [file s1]

A.

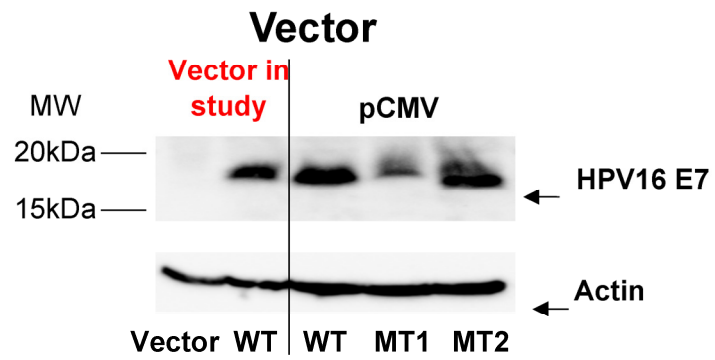

**Transfected 293T**

B.

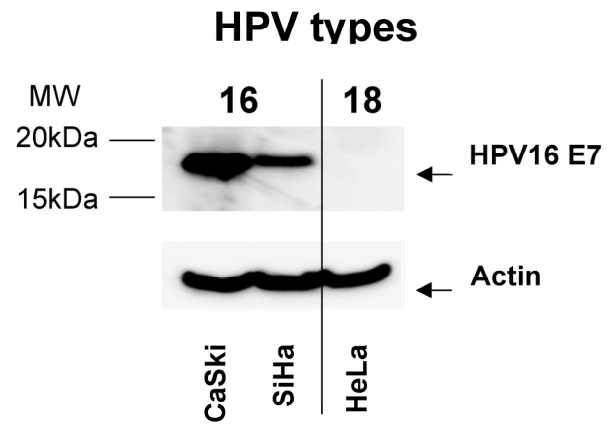

**Endogenous**

### C. Western Blotting original images

#### Test HPV16 E7 antibody raw data

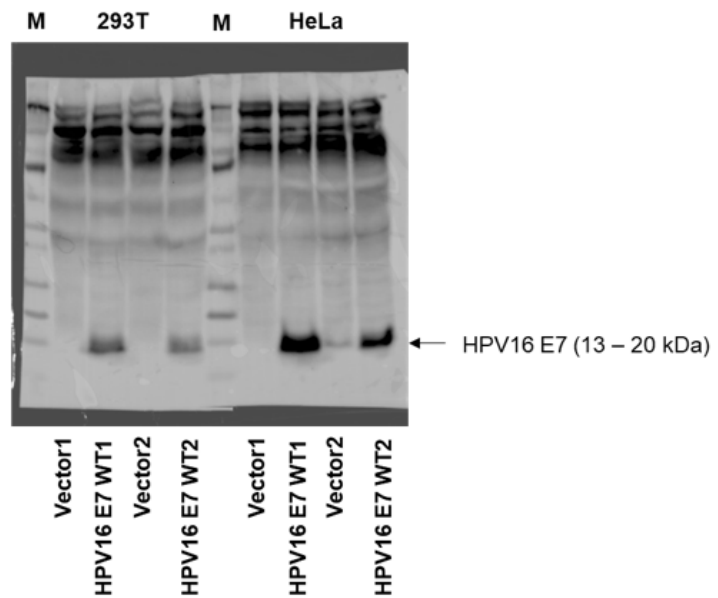

Loading amount of protein in No.1 is double than No.2

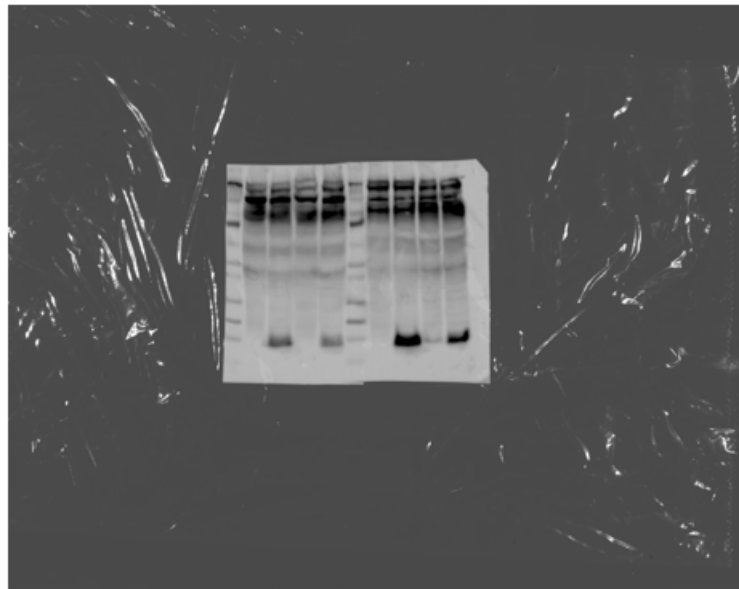

HPV16 E7 Antibody (716-325): sc-51951.

Western blot analysis of HPV 16 E7 expression

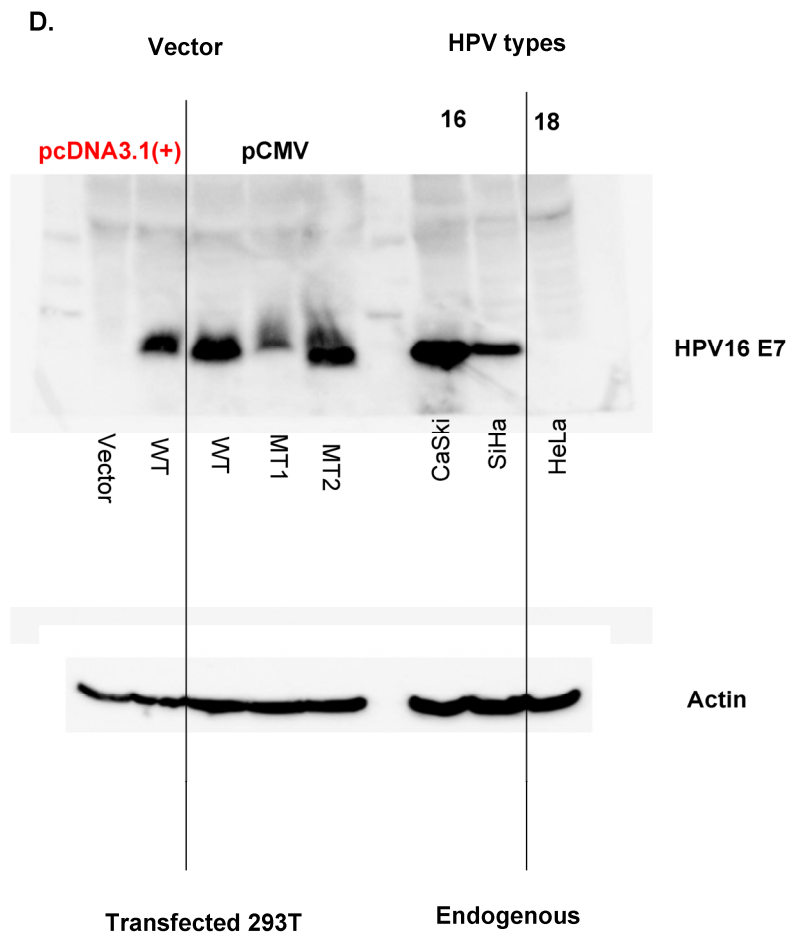

**E. HeLa Western blot Raw Data**

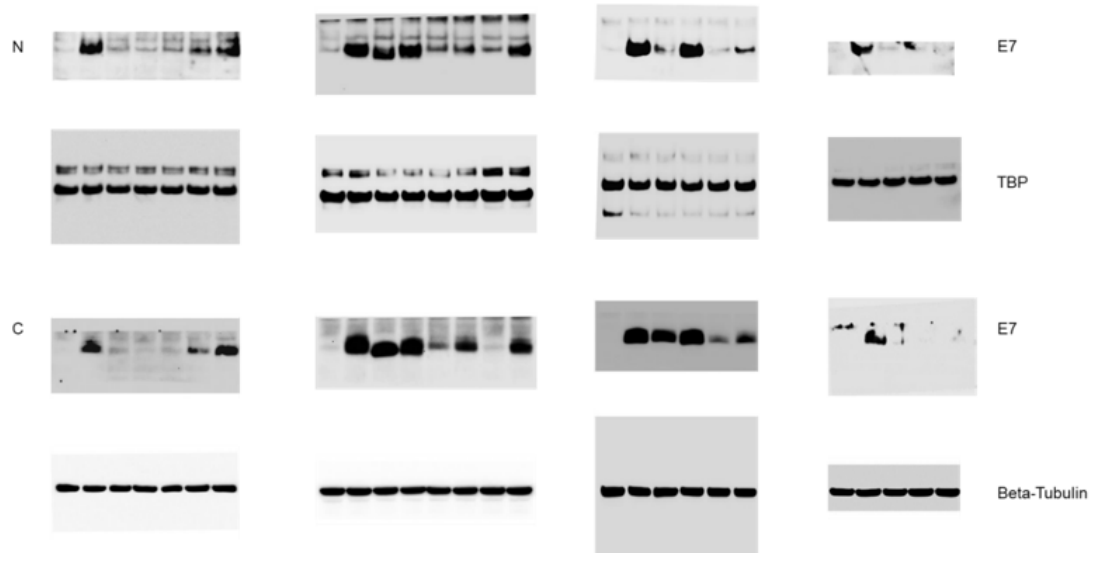

F. 293T Western blot Raw Data

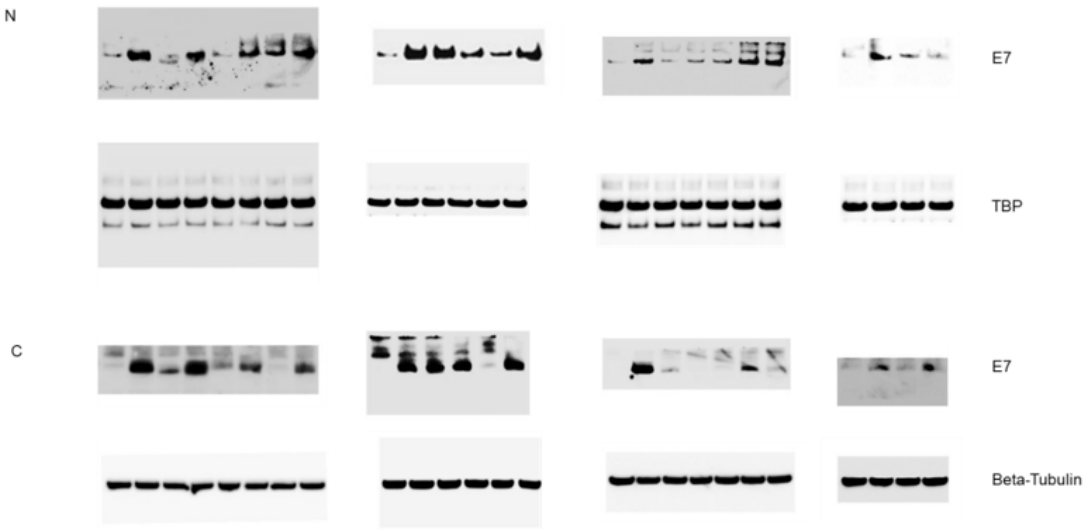

**Figure S1.** Detection of HPV16 E7 protein expression in transfected 293T cells and cervical cancer cell lines using the optimum antiHPV16 E7 (716-325) antibody after screening three different antiHPV16 E7 antibodies (Table S2). pcDNA3.1(+)*IRES* GFP-HPV16 E7 WT and positive control, pCMV-HPV16 E7 WT, MT1 (C91S) and MT2 (del DLYC) expressed in transiently transfected 293T cells after 48h in culture (A). Endogenous HPV16 E7 proteins were detected in HPV16 cervical cancer cell lines only, CaSki (600 copies/cell), SiHa (1-2 copies/cell), not detected in the HPV18 cervical cancer cell line, HeLa (B). The results indicated that the antiHPV16 E7 (716-325) antibody has high sensitivity and specificity. (C) Western Blotting original images. Test HPV16 E7 antibody raw data. (D-F) Western blot original images. Blots were cut into strips to probe with multiple antibodies to proteins of differing size to avoid stripping and reprobing.

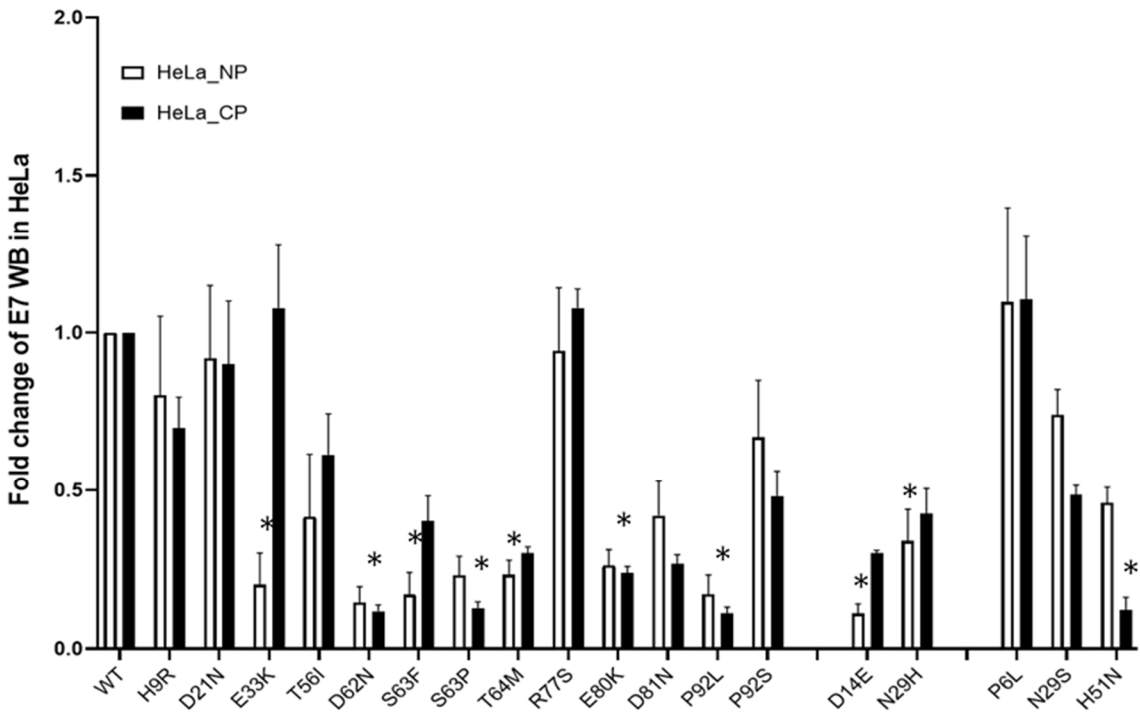

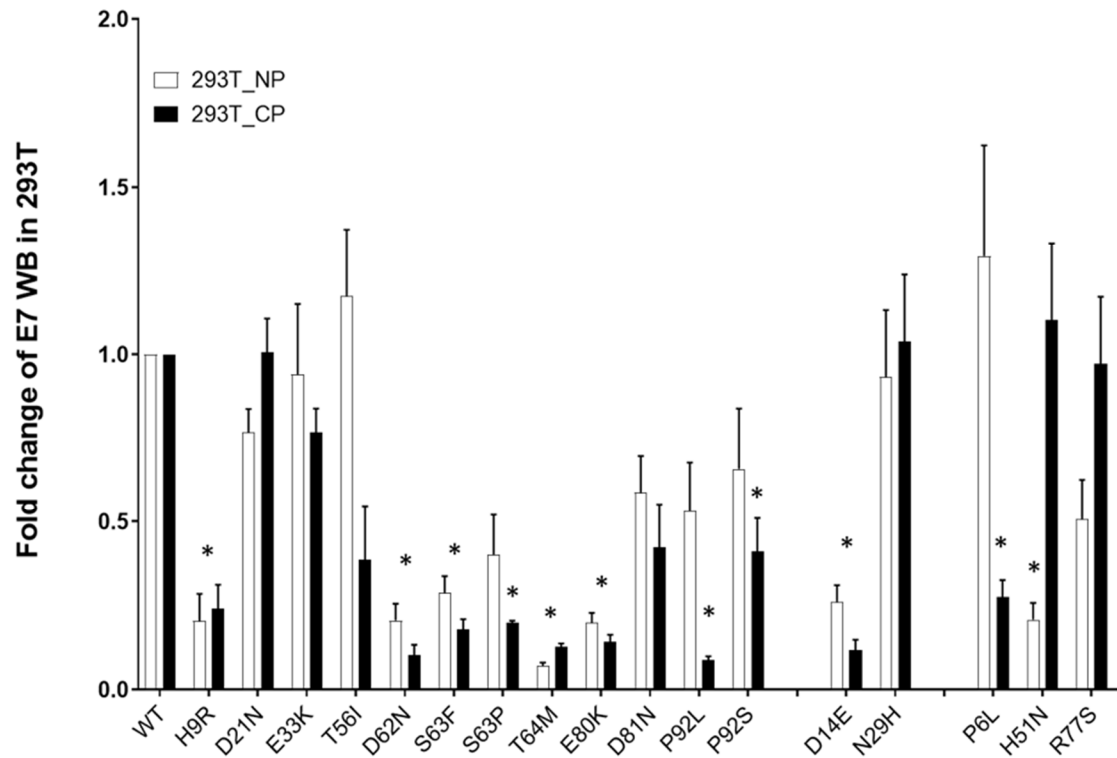

**Figure S2.** Quantitation of western blot analyses of HPV16 E7 variants from HeLa (A) and 293T (B) cells transiently transfected with empty vector, wild-type and mutant E7 constructs. \*: represents significantly lower E7 protein levels as compare with to wild type E7 ( $p < 0.05$ ). The results represent the mean of three independent experiments.

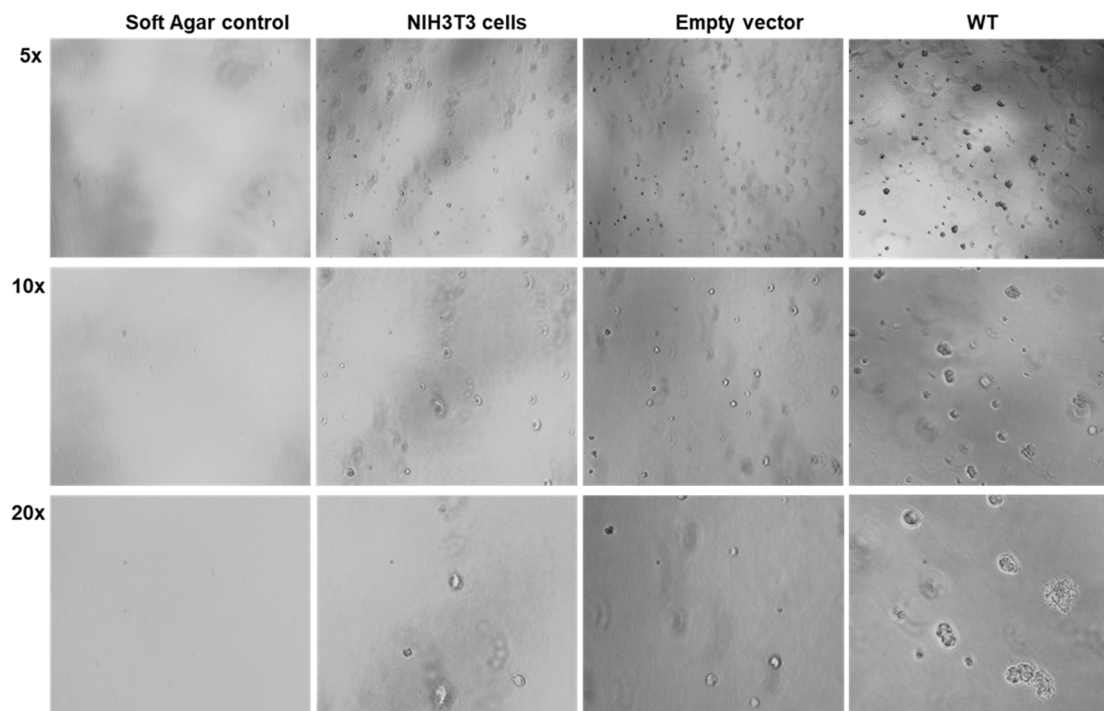

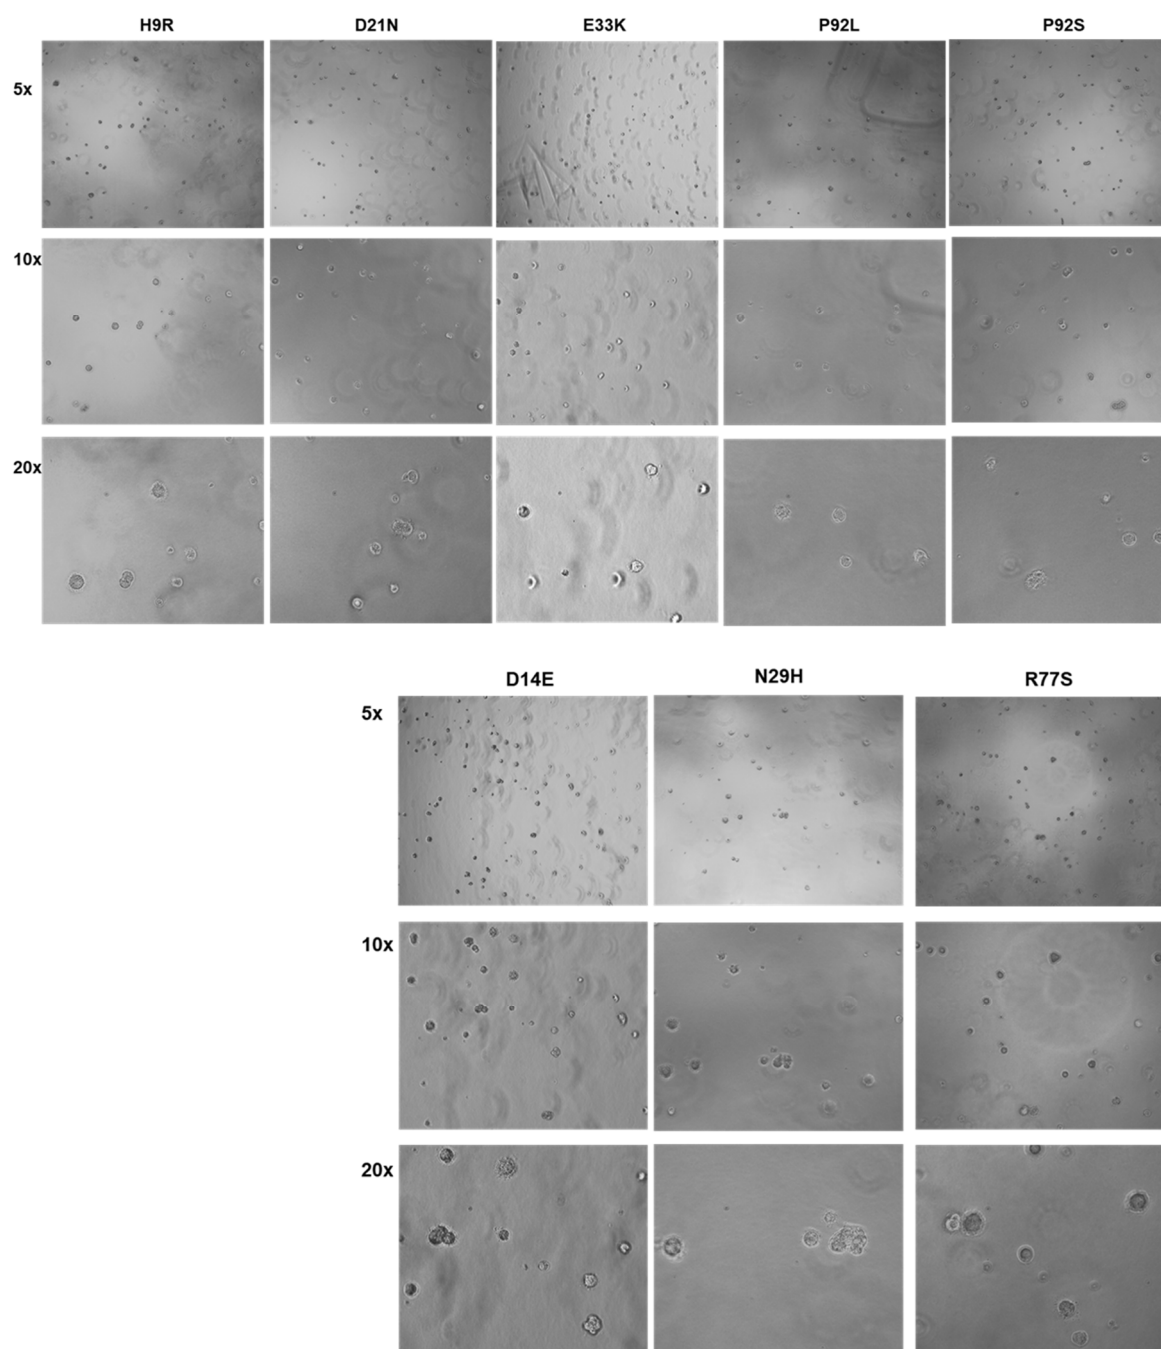

**Figure S3.** Anchorage independent cell growth of HPV16 E7 variant stable clones grown in soft agar. NIH3T3 cells stably transfected with the empty vector, WT and the indicated variants. Colonies formed after 20 days of culture were imaged with 5x, 10x, 20x magnification.

**Table S1.** Oligonucleotide primers.

| Oligo Name                                                 | Sequence (5' to 3')                                                                                      |
|------------------------------------------------------------|----------------------------------------------------------------------------------------------------------|
| <b>Oligonucleotides used for pcDNA3.1+IRESGFP_HPV16E7</b>  |                                                                                                          |
| RecBamHI HPV16-A1E7_Rev.                                   | 5'-CCACACTGGACTAGT GGATCC TTATGGTTTCTGAGAACAGATGGGGCA-3'                                                 |
| RecNheI HPV16-A1E7_For                                     | 5'-GGGAGACCCCAAGCTG GCTAGC GCCACCATGCATGGAGATACACCTACATTG-3'                                             |
| <b>Oligonucleotides used for CloneEZ® PCR Cloning</b>      |                                                                                                          |
| HPV16E7P6LFor                                              | 5'-GGGAGACCCCAAGCTGGCTAGCGCCACCATGCATGGAGATACACTTACATTGCATGAATATATG-3'                                   |
| HPV16E7H9For                                               | 5'-GGGAGACCCCAAGCTGGCTAGCGCCACCATGCATGGAGATACACCTACATTGCATGAATATATG-3'                                   |
| HPV16E7D14EFor                                             | 5'-GGGAGACCCCAAGCTGGCTAGCGCCACCATGCATGGAGATACACCTACATTGCATGAATATATGTTAGATTGCAACCAGAG-3'                  |
| HPV16E7D21NFor                                             | 5'-GGGAGACCCCAAGCTGGCTAGCGCCACCATGCATGGAGATACACCTACATTGCATGAATATATGTTAGATTGCAACCAGAGACAACCTATCTCTACTG-3' |
| HPV16E7P92SRev                                             | 5'-CCACACTGGACTAGTGGATCCTTATGGTTTCTGAGAACAGATGGAACACACAATTCC-3'                                          |
| HPV16E7P92LRev                                             | 5'-CCACACTGGACTAGTGGATCCTTATGGTTTCTGAGAACAGATGAGCACACAATTCC-3'                                           |
| HPV16E7D81NRev                                             | 5'-CCACACTGGACTAGTGGATCCTTATGGTTTCTGAGAACAGATGGGGCACACAATTCCAGTGTGCCATTAAACAGGTCTTCCAAAGTACG-3'          |
| HPV16E7E80KRev                                             | 5'-CCACACTGGACTAGTGGATCCTTATGGTTTCTGAGAACAGATGGGGCACACAATTCCAGTGTGCCATTAAACAGGTCTTCCAAAGTACG-3'          |
| HPV16E7R7SRev                                              | 5'-CCACACTGGACTAGTGGATCCTTATGGTTTCTGAGAACAGATGGGGCACACAATTCCAGTGTGCCATTAAACAGGTCTTCCAAAGTAC-3'           |
| <b>Oligonucleotides used for site-directed mutagenesis</b> |                                                                                                          |
| HPV16E7N29H_Rev                                            | 5'-ctctgagctgctcatgtaattgctcataacagtagagatcag-3'                                                         |
| HPV16E7N29H_For                                            | 5'-ctgactctactgttatgagcaattacatgacagctcagag-3'                                                           |
| HPV16E7N29S_Rev                                            | 5'-ctctgagctgctcatcattgctcataacagtagagatcag-3'                                                           |
| HPV16E7N29S_For                                            | 5'-ctgactctactgttatgagcaattacatgacagctcagag-3'                                                           |
| HPV16E7H51N_Rev                                            | 5'-aaggttacaaattgtaattgctctgctcggtctgcg-3'                                                               |
| HPV16E7H51N_For                                            | 5'-gcagaaccggacagagccattacaattgtaacatt-3'                                                                |
| HPV16E7E33K_Rev                                            | 5'-ttatctctctctcttgagctgctatttaattgctcataaca-3'                                                          |
| HPV16E7E33K_For                                            | 5'-tgttatgagcaattaaatgacagctcaaggaggagatgaa-3'                                                           |
| HPV16E7T56I_Rev                                            | 5'-gagtcacacttgcaacaaaagattacaattgtaattgggtct-3'                                                         |
| HPV16E7T56I_For                                            | 5'-agagccattacaattgtaattctttgtgcaagtgtagct-3'                                                            |
| HPV16E7D62N_Rev                                            | 5'-cgaagcgtagagttacacttgcaacaaaagggtacaatt-3'                                                            |
| HPV16E7D62N_For                                            | 5'-aatattglaacctttgtgcaagtgtaactctacgctcgg-3'                                                            |
| HPV16E7S63F_Rev                                            | 5'-cgcaacaaccgaagcgttaagtcacacttgcaacaa-3'                                                               |
| HPV16E7S63F_For                                            | 5'-ttgtgcaagtgtagctacgctcgggtgtgag-3'                                                                    |
| HPV16E7S63P_Rev                                            | 5'-gcacaaccgaagcgttaggtcacttgcaacaaa-3'                                                                  |
| HPV16E7S63P_For                                            | 5'-ttgtgcaagtgtagctacgctcgggtgtgag-3'                                                                    |
| HPV16E7T64M_Rev                                            | 5'-acgcacaaccgaagcattagagtcacacttgcaac-3'                                                                |
| HPV16E7T64M_For                                            | 5'-gttgcaagtgtagctatgcttcgggtgtgag-3'                                                                    |

**Table S2.** HPV16E7 pcDNA clones and antibodies tested.

|                                              | Description of product | Catalog No. | Company    |
|----------------------------------------------|------------------------|-------------|------------|
| Positive controls                            | CMV 16 E7              | 13686       | Addgene    |
|                                              | CMV 16 E7 C91S         | 13689       | Addgene    |
|                                              | CMV 16 E7 del DLYC     | 13687       | Addgene    |
| Vector for constructing full length HPV16 E7 | pcDNA3.1 (+) IRES GFP  | 51406       | Addgene    |
| Testing antibodies                           | HPV16 E7 (716-325)     | sc-51951    | Santa Cruz |
|                                              | HPV16 E7 (ED17)        | sc6981      | Santa Cruz |
|                                              | HPV16 E7 (8C9)         | 28-0006     | Invitrogen |
